# Supplementary material
Source: publisher figshare collection journal article supplement (https://tandf.figshare.com/ndownloader/files/21518826)
Supplement: Supplementary file 1 [file 21518826]

**SUPPLEMENT**

**Table S1. Characteristics of selected variables between the two groups.**

|  | Included group | Excluded group | P value |
| --- | --- | --- | --- |
| Age (mean ± SD) | 53.32 ± 10.50 | 53.50 ± 9.94 | 0.812* |
| Sex (n, %) |  |  |  |
| Male | 850 (34.8) | 73 (37.8) | 0.217† |
| Female | 1595 (65.2) | 120 (62.2) |  |
| Education level (n, % ) |  |  | 0.003† |
| <9 | 1450 (59.3) | 90 (46.6) |  |
| 9- | 752 (30.8) | 78 (40.4) |  |
| 12- | 243 (9.9) | 25 (13.0) |  |
| Active smoker (n, % ) |  |  | 0.206† |
| Yes | 498 (20.4) | 34 (17.6) |  |
| No | 1947 (79.6) | 159 (82.4) |  |
| Passive smoker (n, % ) |  |  | 0.119† |
| Yes | 1216 (49.7) | 104 (54.5) |  |
| No | 1229 (50.3) | 87 (45.5) |  |
| Alcohol drinker (n, % ) |  |  | 0.392† |
| Yes | 551 (22.5) | 41 (21.4) |  |
| No | 1894 (77.5) | 151 (78.6) |  |
| Daytime nap duration (min) |  |  | 0.605† |
| 0 | 1254 (51.3) | 101 (52.3) |  |
| 1- | 131 (5.4) | 14 (7.3) |  |
| 30- | 372 (15.2) | 25 (13.0) |  |
| 60- | 688 (28.1) | 53 (27.5) |  |
| Nocturnal sleep duration (h) |  |  | 0.328† |
| <7 | 298 (12.2) | 21 (12.5) |  |
| 7- | 581 (23.8) | 37 (22.0) |  |
| 8- | 876 (35.8) | 52 (31.0) |  |
| 9- | 690 (28.2) | 58 (34.5) |  |
| Hypertension |  |  | 0.028† |
| Yes | 987 (40.4) | 64 (33.2) |  |
| No | 1458 (59.6) | 129 (66.8) |  |
| Diabetes mellitus |  |  | 0.005† |
| Yes | 235 (9.6) | 8 (4.1) |  |
| No | 2210 (90.4) | 185 (95.9) |  |
| *Student’s t-test was used to compare means of the continuous variables between the two groups. † Chi-square test was used to compare distributions of category variables between the two groups. | | | |

**Table S2. Distributions of platelet indices values and 10-year ASCVD risk score in participants by daytime nap duration.**

|  | Daytime nap duration (min) | | | |
| --- | --- | --- | --- | --- |
|  | 0 | 1- | 30- | 60- |
| Platelet indices |  |  |  |  |
| PLT (*109/L, median, IQR) | 214 (184, 247) | 205 (180, 226) | 210 (184, 239) | 209 (181, 241) |
| MPV (fl, median, IQR) | 8.9 (8.7, 11.9) | 11.5 (8.8, 12.6) | 11.2 (8.8, 12.5) | 10.9 (8.8, 12.5) |
| PDW (%, median, IQR) | 16.3 (14.6, 18.0) | 15.5 (13.9, 17.8) | 15.9 (13.9, 17.5) | 15.8 (14.1, 17.5) |
| MPV/PLT (median, IQR) | 0.04 (0.04, 0.06) | 0.05 (0.04, 0.06) | 0.05 (0.04, 0.06) | 0.05 (0.04, 0.06) |
| PLT/LYM (median, IQR) | 107.00 (87.78, 131.11) | 113.04 (90.00, 137.69) | 105.44 (87.02, 134.23) | 107.31 (86.06, 133.25) |
| 10-years ASCVD risk (n, %) |  |  |  |  |
| Low | 405 (45.5) | 38 (4.3) | 151 (16.9) | 297 (33.3) |
| High | 849 (54.6) | 93 (6.0) | 221 (14.2) | 391 (25.2) |
| PLT: platelet count, MPV: mean platelet volume, PDW: platelet distribution width, MPV/PLT: mean platelet volume/platelet count, PLT/LYM: platelet count/lymphocyte. | | | | |

**Table S3.** Distributions of individuals by physical activity status and daytime nap length.

| Nap time (min) | Frequency of physical exercise (times per week, n, %)a | |
| --- | --- | --- |
| <4 | 4- |
| 0 | 402 (44.4) | 852 (55.4) |
| 1- | 55 (6.1) | 76 (4.9) |
| 30- | 179 (19.8) | 193 (12.5) |
| 60- | 270 (29.8) | 418(27.2) |
| a Chi-square test were used to compare distributions of category variables between groups., *P*<0.05. | | |
